# Supplementary material for: Integrating Behavioral Health and Serious Illness Care in a Post–COVID-19 Environment
Source: Atypon-hosted journal article supplement (doi:10.1176/appi.ps.202000903), 2021-06-09
Supplement: appi.ps.202000903.ds001.pdf [file appi.ps.202000903.ds001.pdf]

### BEHAVIORAL HEALTH IN SERIOUS ILLNESS CARE

#### Serious Illness Care Population: Behavioral Health Issues in Serious Illness Care

| Categories of Behavioral Health Issues in Serious Illness Care                                                                                                                                                                                                                                                                                                                                                                                   | Clinical Scenarios                                                                                                                                                                                                                                                                                                        |
|--------------------------------------------------------------------------------------------------------------------------------------------------------------------------------------------------------------------------------------------------------------------------------------------------------------------------------------------------------------------------------------------------------------------------------------------------|---------------------------------------------------------------------------------------------------------------------------------------------------------------------------------------------------------------------------------------------------------------------------------------------------------------------------|
| <ul style="list-style-type: none"> <li>• Pre-existing behavioral health conditions</li> <li>• Newly developed behavioral health problems, including:                             <ul style="list-style-type: none"> <li>○ Disorders as a direct manifestation of medical illness</li> <li>○ Disorders as a complication of medical treatment</li> <li>○ Disorders in the context of psychosocial stressors and disability</li> </ul> </li> </ul> | Anxiety<br>Confusion/Delirium<br>Cognitive impairment<br>Depression<br>Existential/spiritual crisis<br>Grief/Complicated grief<br>Interpersonal/family conflict<br>Personality disorders<br>Substance use disorders<br>Serious mental illness/Psychosis<br>Trauma-related conditions<br>Other behavioral health scenarios |

#### Model for Behavioral Health Care in Serious Illness Care Settings Based on Four Guiding Principles

|                                                                                    |                                      |                                    |                                 |                   |
|------------------------------------------------------------------------------------|--------------------------------------|------------------------------------|---------------------------------|-------------------|
| 1. Person/Family-oriented care reflecting individual values, preferences and goals | 2. Interdisciplinary team-based care | 3. Coordinated and integrated care | 4. Value-based accountable care | 5. Equitable care |
|------------------------------------------------------------------------------------|--------------------------------------|------------------------------------|---------------------------------|-------------------|

| Key Components                         |                                               |                                                                            | Examples and Elaboration                                                                                                                                                                                                                                                                                                                                                                                                                                                                                                                                                                                               |
|----------------------------------------|-----------------------------------------------|----------------------------------------------------------------------------|------------------------------------------------------------------------------------------------------------------------------------------------------------------------------------------------------------------------------------------------------------------------------------------------------------------------------------------------------------------------------------------------------------------------------------------------------------------------------------------------------------------------------------------------------------------------------------------------------------------------|
| 1. Person/Family Centered Care Process | Provider/ Person communication                | Ensuring shared-decision making that incorporates behavioral health issues | <ul style="list-style-type: none"> <li>• Pro-active communication to address patients concerns/fears</li> <li>• Infrastructure for robust provider and patient communication across care processes</li> <li>• Communication using familiar style for layperson</li> <li>• Culturally appropriate communication among patients and providers</li> <li>• Continuous alignment with patient's care preferences across all domains, including behavioral health</li> <li>• Telehealth to support remote provider/ patient/ care giver communication</li> <li>• Advanced care planning directives, patient proxy</li> </ul> |
|                                        |                                               | Facilitating and tracking referral with                                    | <ul style="list-style-type: none"> <li>• Screening with standardized behavioral health measures adapted to serious illness settings</li> <li>• Further evaluation by team members with training in behavioral health assessment</li> <li>• Standardized protocols for appropriate and timely follow up and reassessment</li> <li>• Goal-setting and comprehensive advanced care planning to assure care is in concordance with patient goals and preferences</li> </ul>                                                                                                                                                |
| 2. Clinical Functions                  | Case finding, screening, and referral to care | Providing screening, initial assessment, and follow up                     | <ul style="list-style-type: none"> <li>• Screening with standardized behavioral health measures adapted to serious illness settings</li> <li>• Further evaluation by team members with training in behavioral health assessment</li> <li>• Standardized protocols for appropriate and timely follow up and reassessment</li> <li>• Goal-setting and comprehensive advanced care planning to assure care is in concordance with patient goals and preferences</li> </ul>                                                                                                                                                |
|                                        |                                               | Facilitating and tracking referral with                                    | <ul style="list-style-type: none"> <li>• Establish network for behavioral health referral with formalized appointment arrangements for "greasing" referral pathways, sharing information pre/post-referral</li> </ul>                                                                                                                                                                                                                                                                                                                                                                                                  |

|                                                   |                                                                        |                                                                                                                                                                                                                                                                                                                                                                                                                                                                                                                                                                                              |                                                                                                                                                                                                                                                                                                                                                                                                                                                                                                                                                                                                                                                                                                                                                                              |
|---------------------------------------------------|------------------------------------------------------------------------|----------------------------------------------------------------------------------------------------------------------------------------------------------------------------------------------------------------------------------------------------------------------------------------------------------------------------------------------------------------------------------------------------------------------------------------------------------------------------------------------------------------------------------------------------------------------------------------------|------------------------------------------------------------------------------------------------------------------------------------------------------------------------------------------------------------------------------------------------------------------------------------------------------------------------------------------------------------------------------------------------------------------------------------------------------------------------------------------------------------------------------------------------------------------------------------------------------------------------------------------------------------------------------------------------------------------------------------------------------------------------------|
|                                                   |                                                                        |                                                                                                                                                                                                                                                                                                                                                                                                                                                                                                                                                                                              | <ul style="list-style-type: none"> <li>• Patient preparation and tracking to assure successful referral connection across different care settings and providers if a referral is needed</li> </ul>                                                                                                                                                                                                                                                                                                                                                                                                                                                                                                                                                                           |
|                                                   | Longitudinal care management                                           | Coordinating, communicating, and following up relentlessly                                                                                                                                                                                                                                                                                                                                                                                                                                                                                                                                   | <ul style="list-style-type: none"> <li>• Assuring appropriateness and timeliness of behavioral health and other services</li> <li>• Transitional care and care coordination</li> <li>• Prevention of unnecessary emergency department visits/hospitalizations due to untreated behavioral health issues</li> <li>• Mapping patient behavioral health needs over time and across settings</li> </ul>                                                                                                                                                                                                                                                                                                                                                                          |
|                                                   |                                                                        | Managing clinical crises or any severe or sudden change of behavior                                                                                                                                                                                                                                                                                                                                                                                                                                                                                                                          | <ul style="list-style-type: none"> <li>• Protocols for managing suicidality</li> <li>• Protocols for managing agitation/delirium</li> <li>• Protocols for assessment of capacity to refuse/consent to treatments or diagnostics</li> <li>• Protocols for managing symptom flares</li> <li>• Protocols for managing disruption of social support</li> </ul>                                                                                                                                                                                                                                                                                                                                                                                                                   |
|                                                   | Integrated evidence-based and measurement-based behavioral health care | Providing access to evidence-based psychopharmacological and evidence-based psychosocial interventions                                                                                                                                                                                                                                                                                                                                                                                                                                                                                       | <ul style="list-style-type: none"> <li>• Preventive services to reduce occurrence or severity of behavioral health issues</li> <li>• Psychiatric medication management (especially in context of complex co-morbidities)</li> <li>• Psychosocial interventions (e.g., cognitive-behavioral, motivational enhancement, problem solving, trauma-related therapies, palliative care psychotherapies including meaning centered therapy and dignity-conserving therapy)</li> <li>• Complementary treatments (e.g., music therapy, acupuncture)</li> <li>• Treatment of severe mental illness (e.g., schizophrenia, bipolar disorder)</li> <li>• Pain management</li> <li>• Treatment of substance use disorder</li> <li>• Bereavement/Complicated grief interventions</li> </ul> |
|                                                   |                                                                        | Supporting decision-making of measurement-based, stepped care                                                                                                                                                                                                                                                                                                                                                                                                                                                                                                                                | <ul style="list-style-type: none"> <li>• Incorporate tools and guidelines in clinical workflow/health information technologies</li> <li>• Access to informal (“curbside”) consultation with behavioral health specialists</li> </ul>                                                                                                                                                                                                                                                                                                                                                                                                                                                                                                                                         |
|                                                   | Self-management support to address behavioral health issues            | Promoting patient activation/engagement                                                                                                                                                                                                                                                                                                                                                                                                                                                                                                                                                      | <ul style="list-style-type: none"> <li>• Educational materials and technologies regarding behavioral health</li> <li>• Health coaching</li> </ul>                                                                                                                                                                                                                                                                                                                                                                                                                                                                                                                                                                                                                            |
|                                                   |                                                                        | Promoting health literacy to achieve symptom control and personal goals                                                                                                                                                                                                                                                                                                                                                                                                                                                                                                                      | <ul style="list-style-type: none"> <li>• Self-care and caregiver training in behavioral health issues</li> <li>• Support for discussions about goals of care</li> <li>• Peer support</li> </ul>                                                                                                                                                                                                                                                                                                                                                                                                                                                                                                                                                                              |
| Caregiver support                                 | Providing tools and interventions to support and educate caregivers    | <ul style="list-style-type: none"> <li>• Formal and informal treatments and supports for caregivers including:                             <ul style="list-style-type: none"> <li>- Health coaching/ training to recognize/respond to depression, cognitive deficits, etc. in family members (and themselves)</li> <li>- Informal emotional support; referral to behavioral health provider if indicated</li> <li>- Appropriate toolkits to facilitate goals of care discussions</li> <li>- Home health aides with behavioral health training</li> <li>- Respite care</li> </ul> </li> </ul> |                                                                                                                                                                                                                                                                                                                                                                                                                                                                                                                                                                                                                                                                                                                                                                              |
| <b>3. Workforce to Support Clinical Functions</b> | Interdisciplinary teams                                                | Including generalist/specialist/palliative care physicians, psychiatrists, psychologists, nurses, social workers, chaplains, behavioral health care managers,                                                                                                                                                                                                                                                                                                                                                                                                                                | <ul style="list-style-type: none"> <li>• Embedded or formalized network relationship with trained prescribers of psychiatric medications</li> <li>• Embedded or formalized network relationship with psychologist, nurse, social worker or other behavioral health specialists</li> <li>• Embedded or formalized network relationship to support care coordination (“lead point of contact on the healthcare team”)</li> <li>• Formal/ informal linkage to social support services</li> <li>• Formal/informal linkage to spiritual care providers</li> <li>• Strong organizational structures to support staff satisfaction and reduce staff burnout</li> </ul>                                                                                                              |

Commented [SB(1)]: Add EB-telehealth as a separate new subdomain either to the second or third column

|                                                                         |                                                              |                                                                                                                                                                                              |                                                                                                                                                                                                                                                                                                                                                                                                                                                                                                                                                                                                                                                                                                                                                                                                                                                                                       |
|-------------------------------------------------------------------------|--------------------------------------------------------------|----------------------------------------------------------------------------------------------------------------------------------------------------------------------------------------------|---------------------------------------------------------------------------------------------------------------------------------------------------------------------------------------------------------------------------------------------------------------------------------------------------------------------------------------------------------------------------------------------------------------------------------------------------------------------------------------------------------------------------------------------------------------------------------------------------------------------------------------------------------------------------------------------------------------------------------------------------------------------------------------------------------------------------------------------------------------------------------------|
|                                                                         |                                                              | patients, caregivers/peers, etc.                                                                                                                                                             | <ul style="list-style-type: none"> <li>• Access to appropriate physical and mental health services for all SIC providers</li> </ul>                                                                                                                                                                                                                                                                                                                                                                                                                                                                                                                                                                                                                                                                                                                                                   |
|                                                                         | Competencies                                                 | Providing training, supervision and assessment to assure competencies in evidence-based practices                                                                                            | <ul style="list-style-type: none"> <li>• Training and supervision for general medical/palliative care providers to develop behavioral health competencies</li> <li>• Training and supervision for behavioral health providers to develop competencies in serious illness care including advance care planning and basic symptom management</li> <li>• Training and supervision in facilitating end-of-life conversations and maintaining patient treatment alliance</li> <li>• Training and supervision in effective methods to facilitate communication across medical silos between general medical and behavioral health providers</li> <li>• Knowledge and competencies in social services and other needs for patients and connecting patients to those services</li> <li>• Just-in-time training to meet unexpected needs and allow for greater fluidity of roles</li> </ul>    |
| <b>4. Structures to Support Clinical Functions</b>                      | Health information technologies and other technology support | Commissioning and maintaining systematic tracking of clinical information and exchange among team members across settings                                                                    | <ul style="list-style-type: none"> <li>• Incorporating behavioral health concepts and terms in HIT systems</li> <li>• Integrated electronic medical records for behavioral health and serious illnesses</li> <li>• Electronic health records with registry functionality to support longitudinal care management for behavioral health issues</li> <li>• Data sharing platform including secure mobile devices to connect all care team members</li> <li>• Policies and support to guide discussions with patients about privacy and sharing of information among providers</li> <li>• Telemedicine capacity to assure access to behavioral health care for patients with limited mobility</li> <li>• Adaptation of telehealth delivery models and self-management apps for SIC</li> <li>• Easy access to co-located psychosocial information in electronic health records</li> </ul> |
|                                                                         | Linkages with community/social services                      | Initiating and maintaining formal arrangements with housing, entitlement, and other social support services tailored to patients' behavioral health needs (especially severe mental illness) | <ul style="list-style-type: none"> <li>• Home Safety and Access Adaptations through home maintenance and modification programs</li> <li>• Housing support services</li> <li>• Transportation</li> <li>• Meals on Wheels</li> <li>• Home maker services</li> <li>• Personal care (e.g., assistance for dependence)</li> <li>• Physical and financial abuse assessment and response</li> <li>• Social care plan (e.g., social/cultural network contacts, financial security, other social/legal needs)</li> </ul>                                                                                                                                                                                                                                                                                                                                                                       |
|                                                                         | Systematic quality improvement                               | Using quality metrics and other improvement strategies targeted to behavioral health care                                                                                                    | <ul style="list-style-type: none"> <li>• Formal quality improvement efforts targeting behavioral health care through:                             <ul style="list-style-type: none"> <li>- Implementing quality measures for monitoring and evaluation</li> <li>- Continuous assessment of variation in evidence based processes and clinical outcomes</li> <li>- Behavioral health workforce with competencies in quality improvement tools and techniques</li> </ul> </li> </ul>                                                                                                                                                                                                                                                                                                                                                                                                    |
|                                                                         |                                                              |                                                                                                                                                                                              |                                                                                                                                                                                                                                                                                                                                                                                                                                                                                                                                                                                                                                                                                                                                                                                                                                                                                       |
| <b>5. Policies to Enhance and Incentivize Effective Integrated Care</b> | Accountability                                               | Sharing responsibility among team members to meet performance standards for all care, including behavioral health                                                                            |                                                                                                                                                                                                                                                                                                                                                                                                                                                                                                                                                                                                                                                                                                                                                                                                                                                                                       |

|  |         |                                                                                                       |                                                                                                                                                                                                                                                                                  |
|--|---------|-------------------------------------------------------------------------------------------------------|----------------------------------------------------------------------------------------------------------------------------------------------------------------------------------------------------------------------------------------------------------------------------------|
|  | Payment | Incorporating behavioral health-related costs in payment models that encourage efficiency and quality | <ul style="list-style-type: none"><li>• Development of sustainability strategies to support behavioral health services:<ul style="list-style-type: none"><li>- Capitated payment</li><li>- Value-based payment models</li><li>- Fee-for-service environments</li></ul></li></ul> |
|--|---------|-------------------------------------------------------------------------------------------------------|----------------------------------------------------------------------------------------------------------------------------------------------------------------------------------------------------------------------------------------------------------------------------------|
